# Supplementary material for: Nano-TiO2 immobilized polyvinylidene fluoride based spongy-spheres for ciprofloxacin photocatalytic degradation: antibacterial activity removal, mechanisms, UVA LED irradiation and easy recovery
Source: Royal Society of Chemistry journal article supplement (doi:10.1039/d4en00302k), 2024-01-01
Supplement: d4en00302k1.pdf [file d4en00302k1.pdf]

**(Supporting information)**

**Nano-TiO<sub>2</sub> immobilized Polyvinylidene fluoride based spongy-spheres: Ciprofloxacin photocatalytic degradation with antibacterial activity removal, mechanism, UVA LED irradiation and easy recovery**

**Text S1:** CIP concentration was analysed by high-performance liquid chromatography (HPLC Shimadzu LC-20A). The column used for HPLC was Phenomenex Kinetex EVO C18 2.6µm, 4.6X100mm. An Isocratic method with mobile phase of 0.1 % Formic acid in Water: Acetonitrile (85:15) at 0.8 mL/min flowrate was used.

**Text S2.** The degradation by-products were analysed by UPLC coupled with a Q-ToF mass spectrometer (Agilent G6546A, MS Q-ToF, Dual AJS ESI) with Poroshell-C18 column (2.1 X 50 mm, 2.7 µm). The mobile phase was 0.1% Formic acid in water (A) and Acetonitrile (B). The gradient method was used with compositions 95 % A and 5 % B for 0.5 min. 5 % A and 95 % B from 2.3 min and 0.9 min hold. 95 % A and 5 % B from 3.5 min till 4.0 min. The flow rate was 0.6 mL/min. The Q-ToF-MS system was equipped with an electrospray ionization interface (ESI) source. Positive Electrospray ionization (ESI) mode was employed for MS/MS analysis. The injection volume was 2 µL. The operations parameters for ESI were set up as follow: fragmentor voltage = 175 V, Gas temperature 320 °C,

**Text S3:** Scherrer's equation

$$D = \frac{K\lambda}{\beta \cos\theta}$$

D is the crystallite size, K is the Scherrer constant (0.98), λ is the wavelength (1.54), β is the full width at half maxima (FWHM) of the peak

**Text S4:** Electrical energy

The electrical energy consumption is calculated by calculating the electrical energy per order [EE<sub>0</sub>] kWh/m<sup>3</sup>/Order,

$$EE_0 = \frac{38.4 \times P}{V \times K}$$

Where, P is the power of the light source (kW), V is the treated volume (L), K is the pseudo first order rate constant ( $k_{\text{obs}} = \text{min}^{-1}$ ).

**Table S1.** Real tap water (TW) characteristics.

| Sr. NO. | Parameter                    | Tap water   |
|---------|------------------------------|-------------|
| 1       | Biological Oxygen Demand     | < 2 mg/L    |
| 2       | Chemical Oxygen Demand       | < 4.0 mg/L  |
| 3       | Total Suspended Solids (TSS) | 18 mg/L     |
| 4       | Total Dissolved Solids (TDS) | 49.3 mg/L   |
| 5       | Nitrate                      | 0.052 mg/L  |
| 6       | Phosphates                   | 0.036 mg/L  |
| 7       | Chlorides                    | 13.91 mg/L  |
| 8       | Sulphides                    | < 0.05 mg/L |
| 9       | Carbonate                    | 3.94 mg/L   |
| 10      | Bicarbonate                  | 23.61 mg/L  |
| 11      | Sodium                       | 4 mg/L      |
| 12      | Magnesium                    | 1.46 mg/L   |
| 13      | Iron                         | 0.102 mg/L  |
| 14      | pH                           | 7.75        |
| 15      | Temperature                  | 26.4 °C     |
| 16      | conductivity                 | 69.5 μS     |
| 17      | Salinity                     | 38.6 mg/L   |

**Table S2:** BET analysis and porosity of T-PVDF beads

| Sr. No | Sample name      | Average surface area (m <sup>2</sup> /g) | Total pore volume (cc/g) | Average pore radius (Å) | Porosity (ε) (%) |
|--------|------------------|------------------------------------------|--------------------------|-------------------------|------------------|
| 1.     | PVDF             | 2.7550                                   | 0.0074                   | 92.652                  | 90.98            |
| 2.     | PP               | 4.1065                                   | 0.0114                   | 92.766                  | 88.46            |
| 3.     | TP               | 8.6374                                   | 0.0399                   | 170.078                 | 88.30            |
| 4.     | TiO <sub>2</sub> | 77.4609                                  | 0.3371                   | 163.815                 | N.A.             |

**Table S3:** Pseudo first order rate constant for different initial concentration of CIP

| Sr. No. | CIP concentration (ppm) | $k_{obs}$ ( $\text{min}^{-1}$ ) |
|---------|-------------------------|---------------------------------|
| 1       | 1                       | 0.0761                          |
| 2       | 2                       | 0.0415                          |
| 3       | 3                       | 0.0339                          |
| 4       | 4                       | 0.0317                          |
| 5       | 5                       | 0.0282                          |

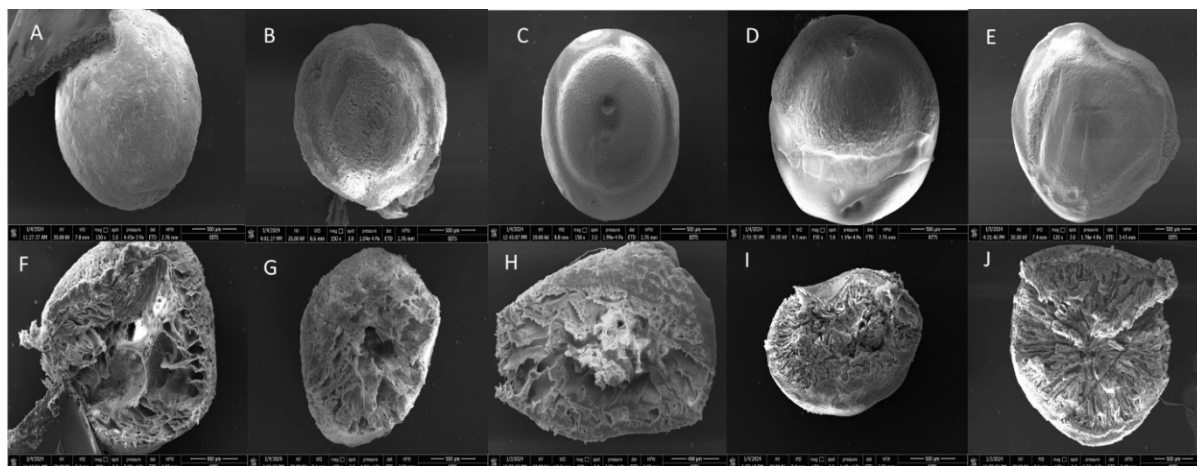

Figure S1: SEM image for different loading of TiO<sub>2</sub> in PVDF beads for whole bead (A-E) and corresponding cross-section (F-J) for 0.7% PVP loaded TP; A,F) 0 %, B,G) 1 % C,H) 5 %, D,I) 10 % , E,J) 15%

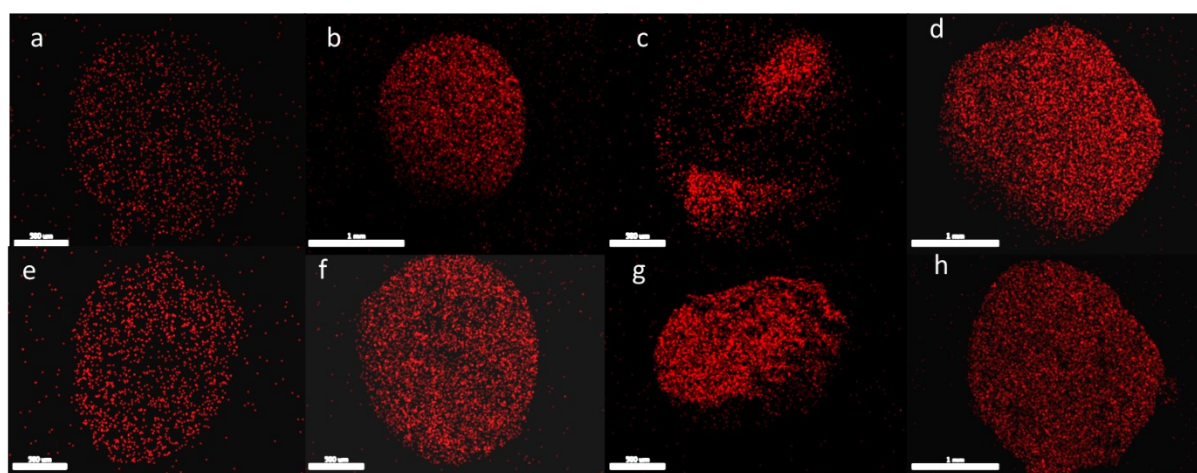

Figure S2: EDX elemental mapping for Ti, for different loading of TiO<sub>2</sub> in PVDF beads for whole bead (a-d) and corresponding cross-section (e-h) for 0.7% PVP loaded TP; a,e) 1 %, b,f) 5 % c,g) 10 %, d,h) 15 %

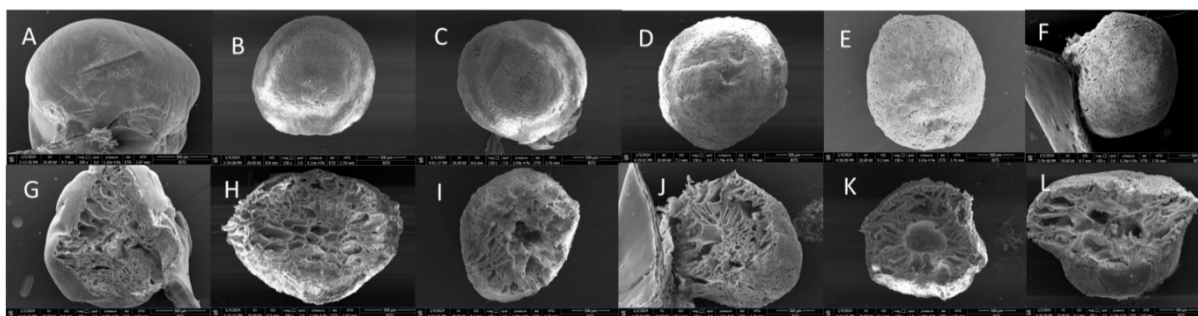

Figure S3: SEM images of whole TP bead with 1 %  $\text{TiO}_2$  (A-F) and corresponding cross-sectional image (G-L) with different loading of PVP. A, G) 0%, B, H) 0.35 %, C, I) 0.7%, D, J) 1.4%, E, K) 2.1% and F, L) 2.8% of PVP

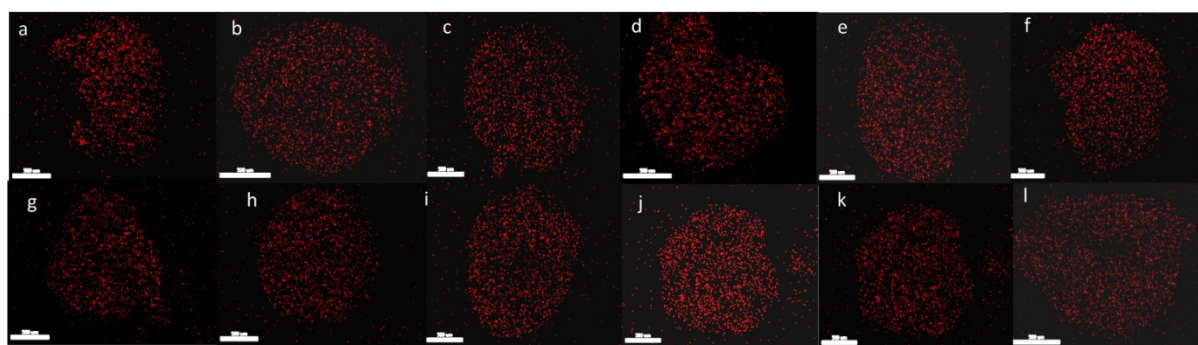

Figure S4: EDX elemental mapping for Ti, for different loading of PVP in PVDF beads for whole bead (a-f) and corresponding cross-section (g-l) for 1%  $\text{TiO}_2$  loaded TP; a,g) 0, b,h) 0.35 c,i) 0.70, d,j) 1.4, e,k) 2.1 and f,l) 2.8

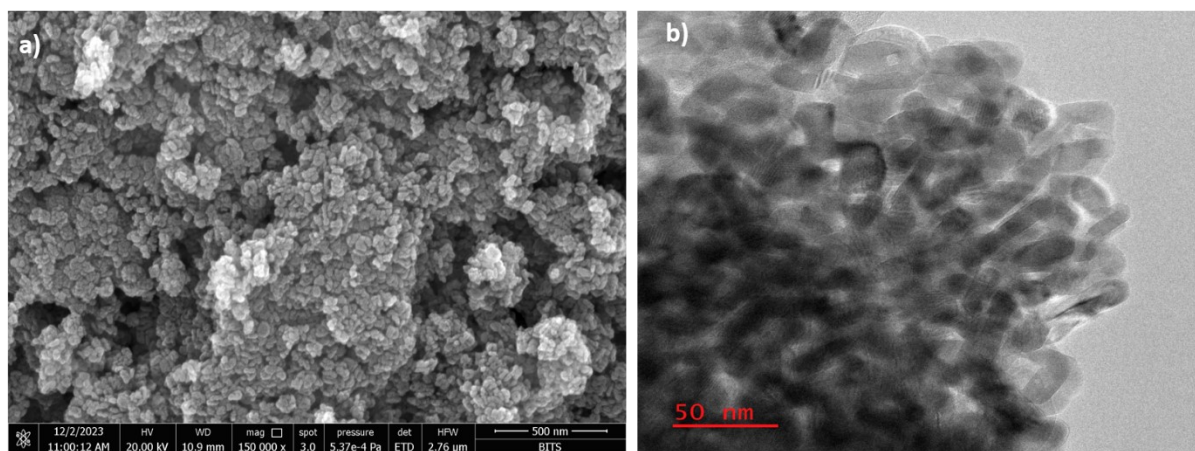

Figure S5: a) SEM image and b) TEM image of  $\text{TiO}_2$  nanoparticles.

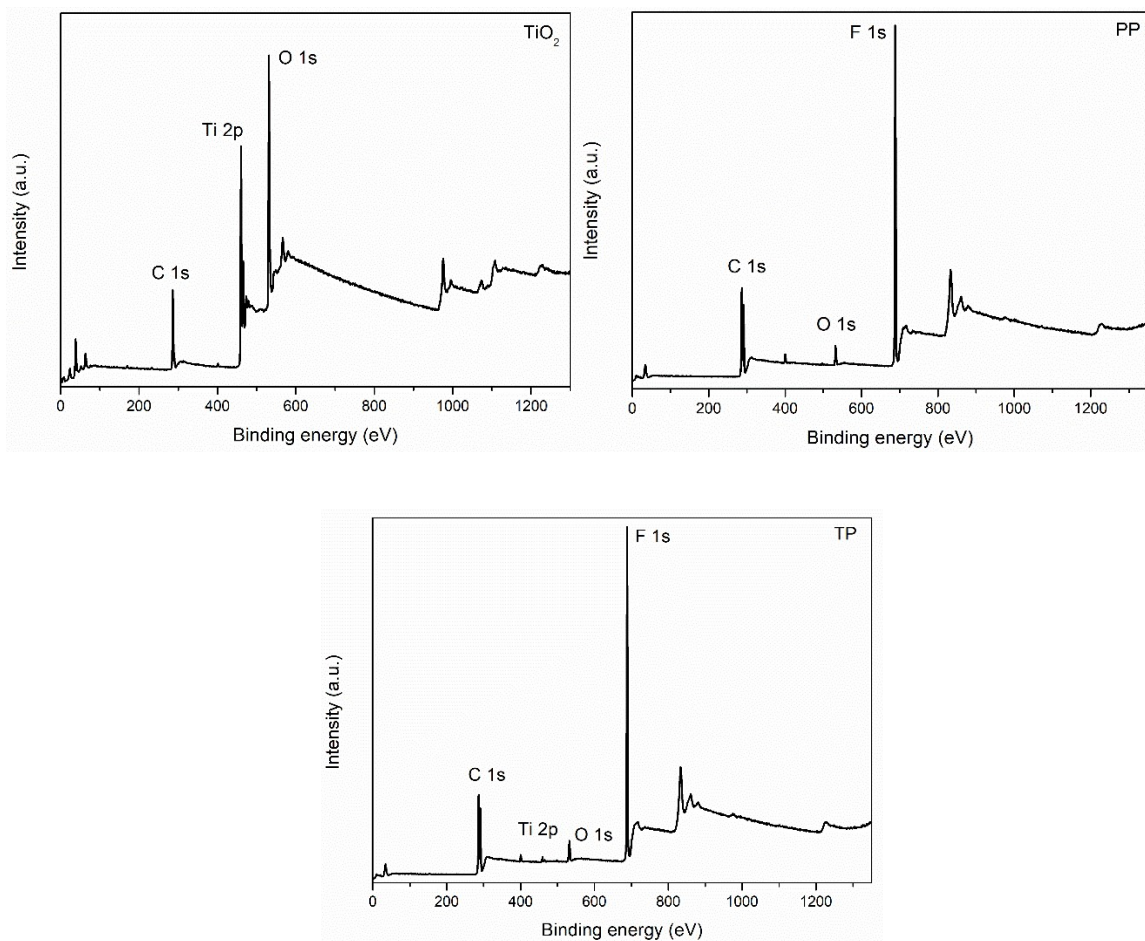

Figure S6: XPS survey spectra for a)  $\text{TiO}_2$ , b) PP and c) TP, TP = 1%  $\text{TiO}_2$  with PVDF having 0.7 % PVP, PP = PVDF having 0.7 % PVP

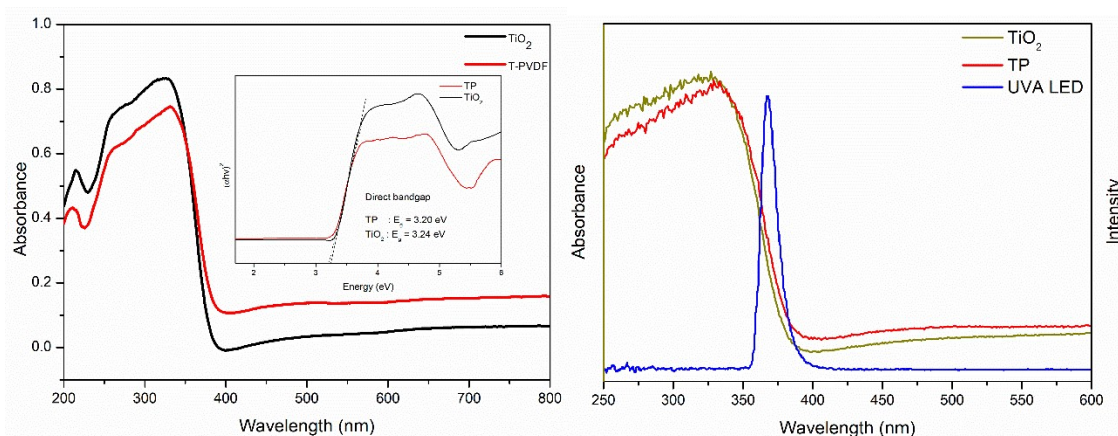

Figure S7: a) UVDRS graph and the band gap energy ( $E_g$ ) of  $\text{TiO}_2$  and TP beads, b) UVDRS spectra of  $\text{TiO}_2$  and TP, and UVA LED emission spectra, TP = 1%  $\text{TiO}_2$  with PVDF having 0.7 % PVP.

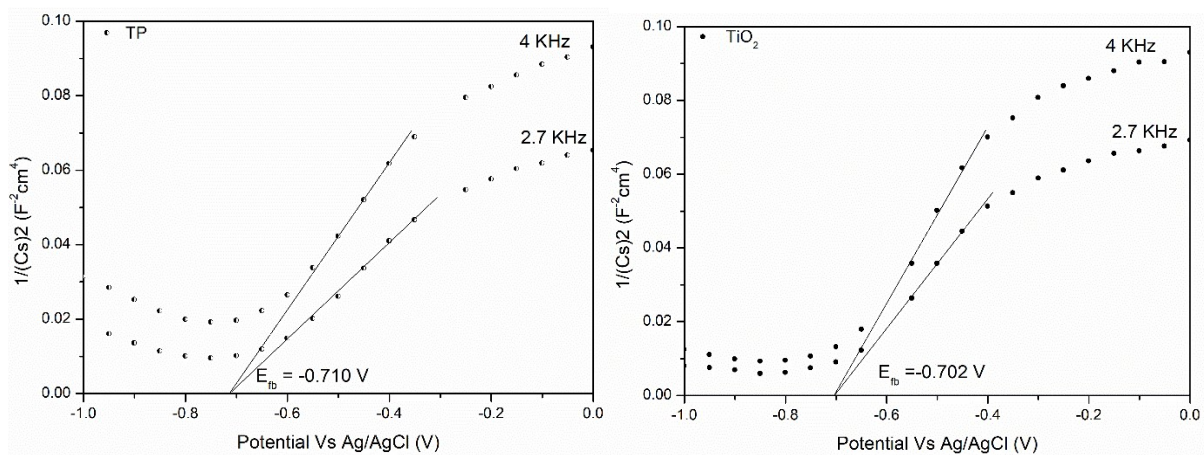

Figure S8: Mott-Schottky plot for a) TP and b)  $TiO_2$  at frequency range of 10 kHz to 10 Hz, from -1.0 V to 0 V against Ag/AgCl, TP = 1%  $TiO_2$  with PVDF having 0.7 % PVP.

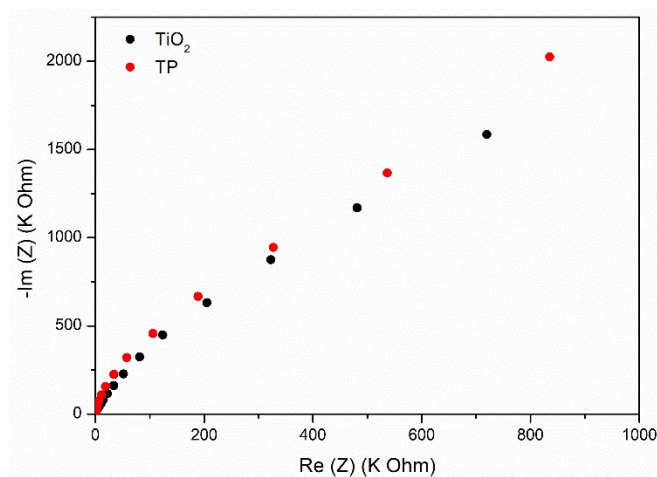

Figure S9: Nyquist plot for TP and  $TiO_2$  at frequency range of 100 kHz to 0.1 Hz, at 0.7 V against Ag/AgCl, TP = 1%  $TiO_2$  with PVDF having 0.7 % PVP.

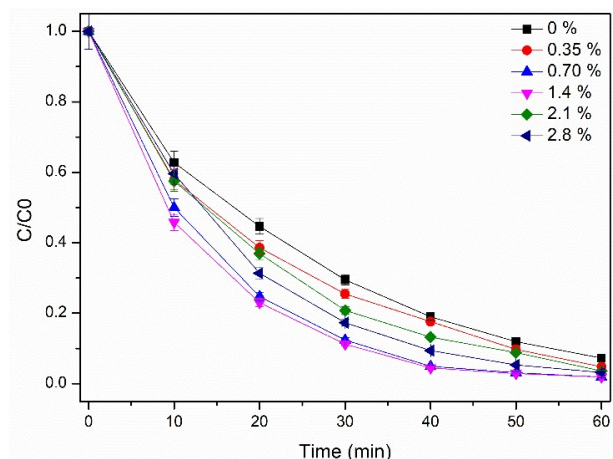

Figure S10. Effect of PVP loading over degradation of CIP by TP under UVA LED irradiation. Experimental conditions: [CIP] =1 ppm, Number of TP beads = 100, TP = 1 % TiO<sub>2</sub> with PVDF, Reaction volume = 50mL

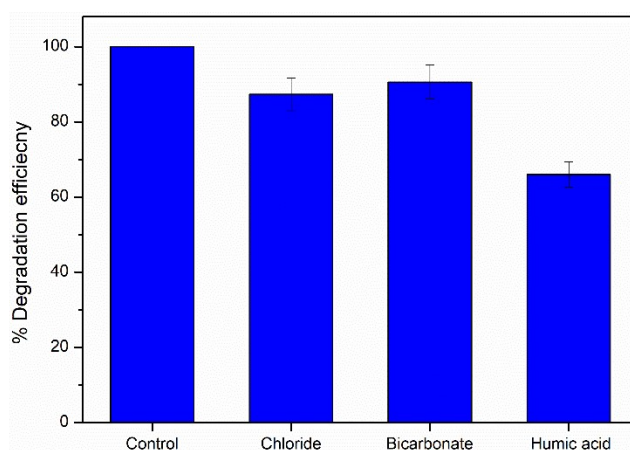

Figure S11. Effect of inorganic anions and NOM, Chloride (Cl<sup>-</sup>), Bicarbonate ( $HCO_3^-$ ), Humic acid (HA) over degradation of CIP by TP under UVA LED irradiation. Experimental conditions: [CIP] =1 ppm, inorganic anion and NOM = 10 mg/L (ppm), TP = 1 % TiO<sub>2</sub> with PVDF, Reaction volume = 50mL, Reaction time = 60 min.

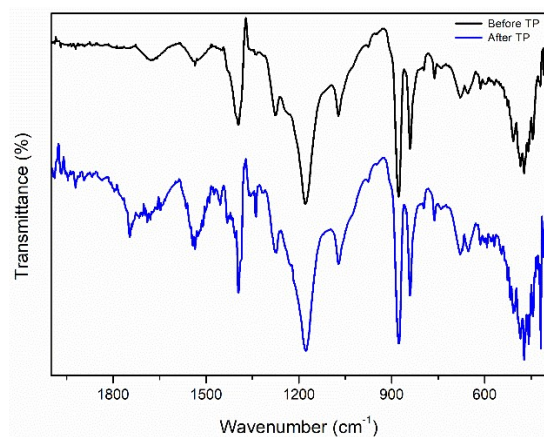

Figure S12: IR spectra of the TP beads before and after 30 cycles of photocatalysis, TP = 1% TiO<sub>2</sub> with PVDF having 0.7 % PVP.

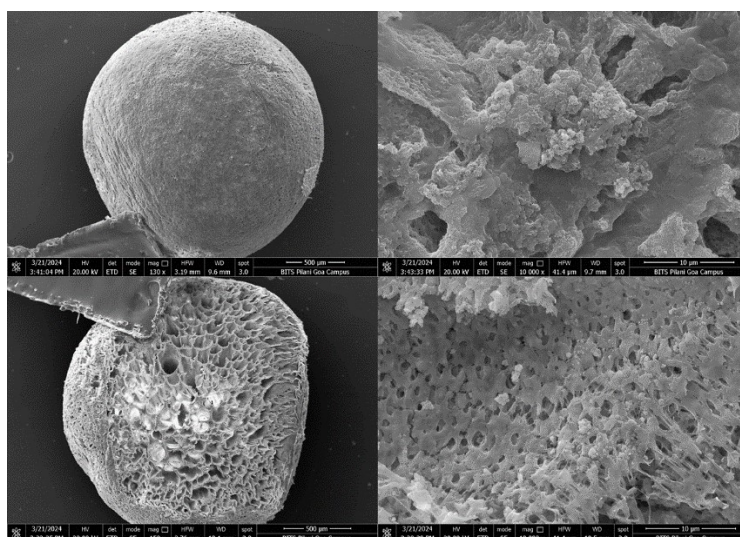

Figure S13: SEM images of the full and cross-section TP beads reused after 30 cycles of photocatalysis, TP = 1% TiO<sub>2</sub> with PVDF having 0.7 % PVP.



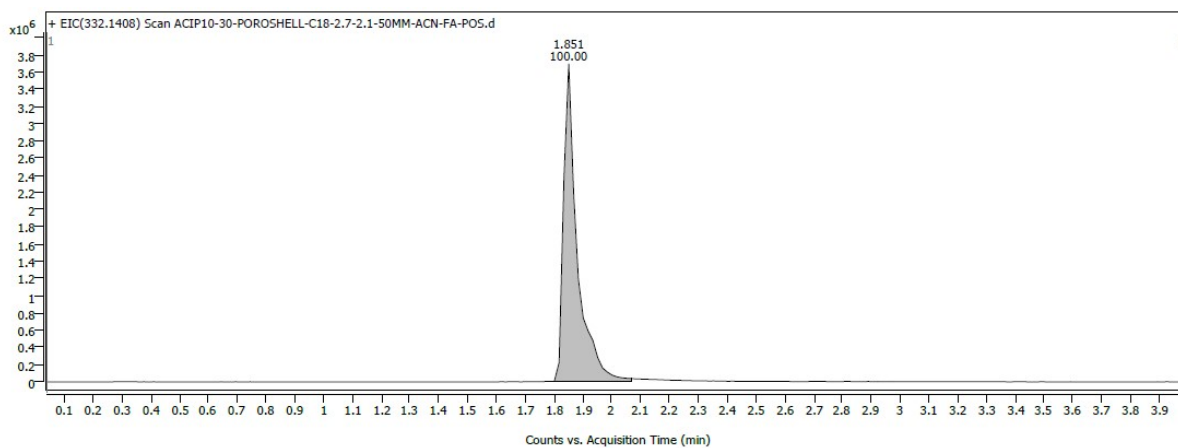

Figure S14: Extracted ion chromatogram (EIC) for  $m/z = 332$

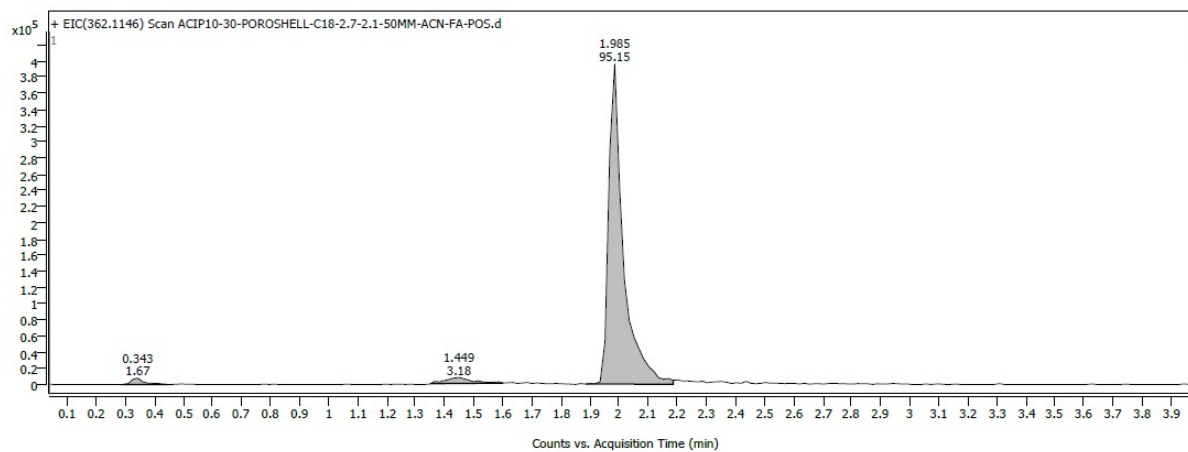

Figure S15: Extracted ion chromatogram (EIC) for  $m/z = 362$

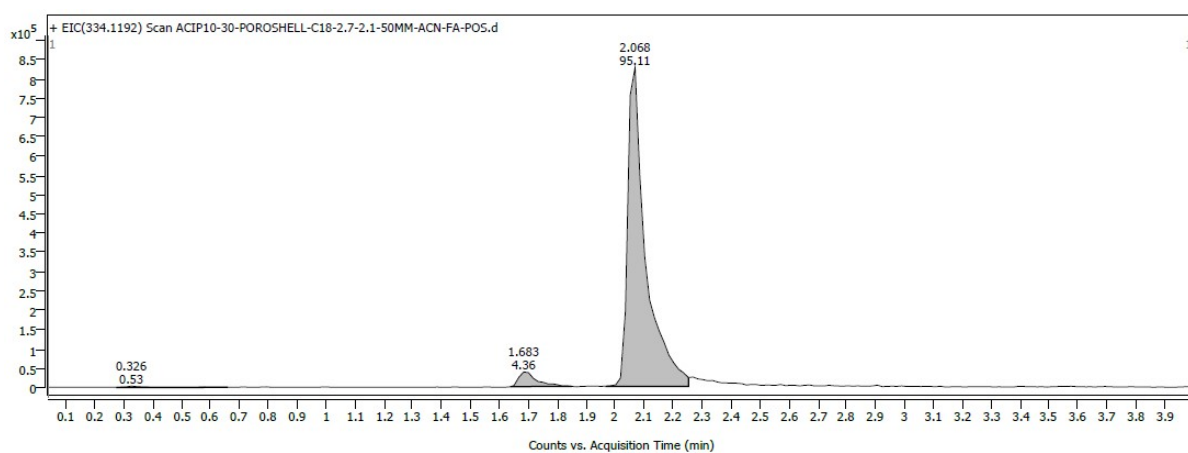

Figure S16: Extracted ion chromatogram (EIC) for  $m/z = 334$

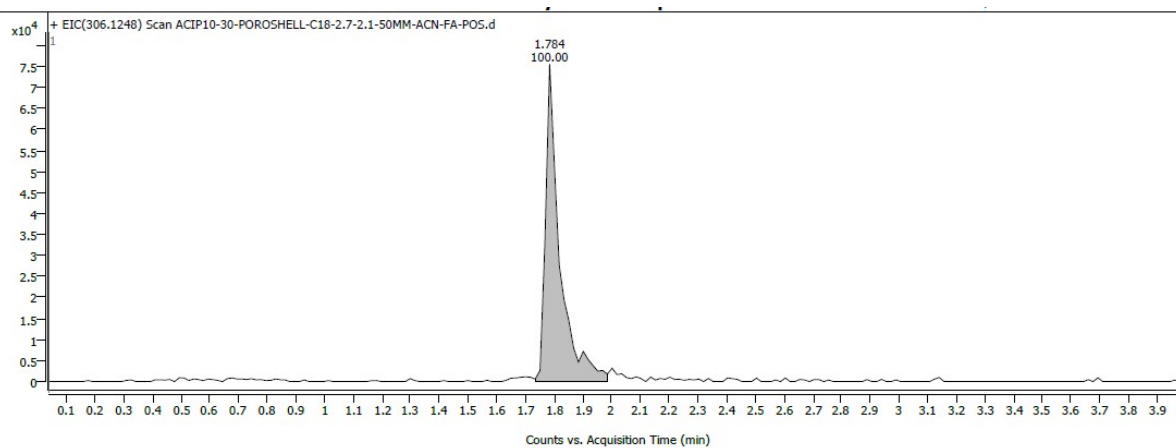

Figure S17: Extracted ion chromatogram (EIC) for  $m/z = 306$

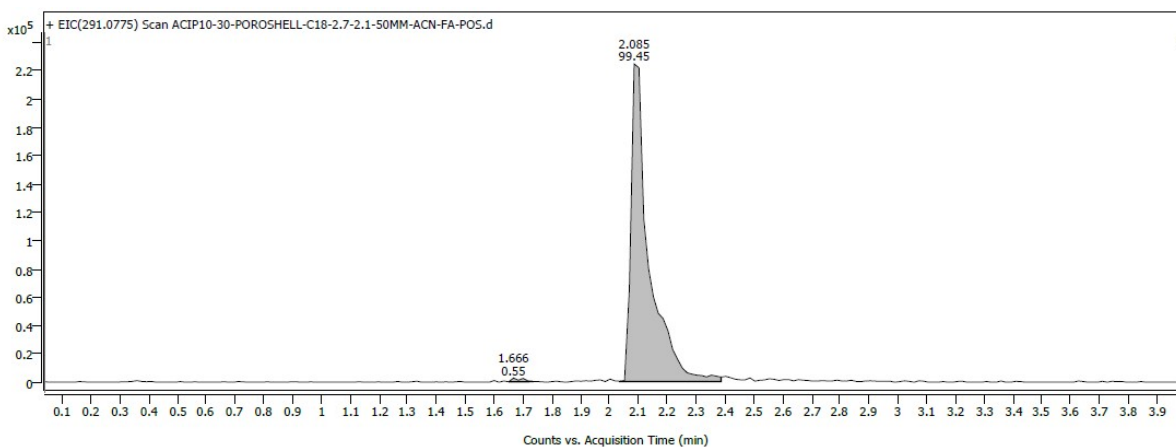

Figure S18: Extracted ion chromatogram (EIC) for  $m/z = 291$

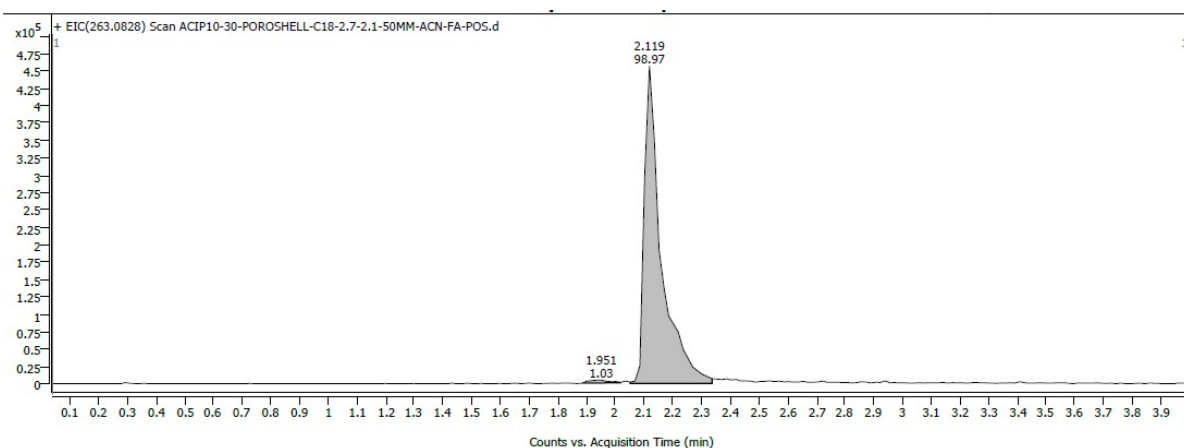

Figure S19: Extracted ion chromatogram (EIC) for  $m/z = 263$

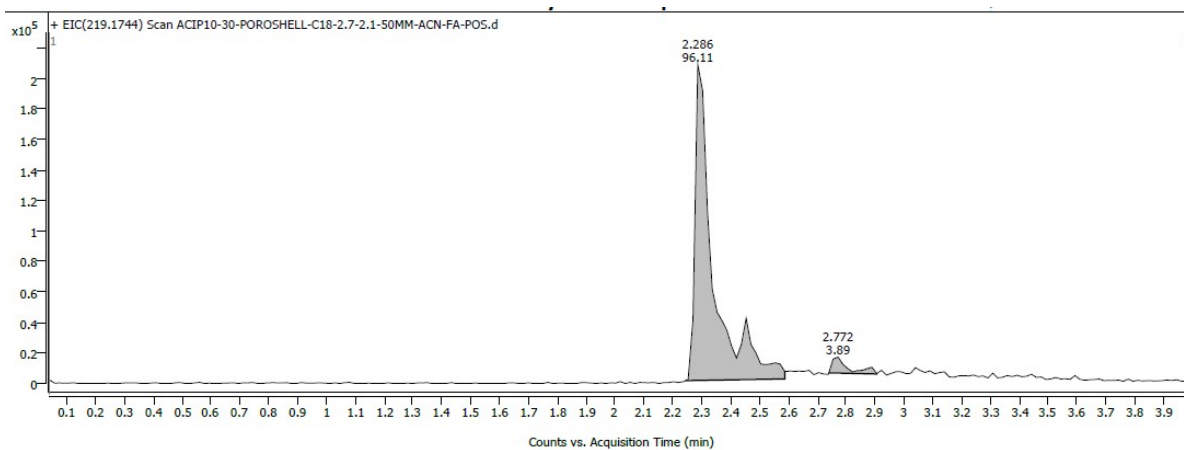

Figure S20: Extracted ion chromatogram (EIC) for  $m/z = 219$

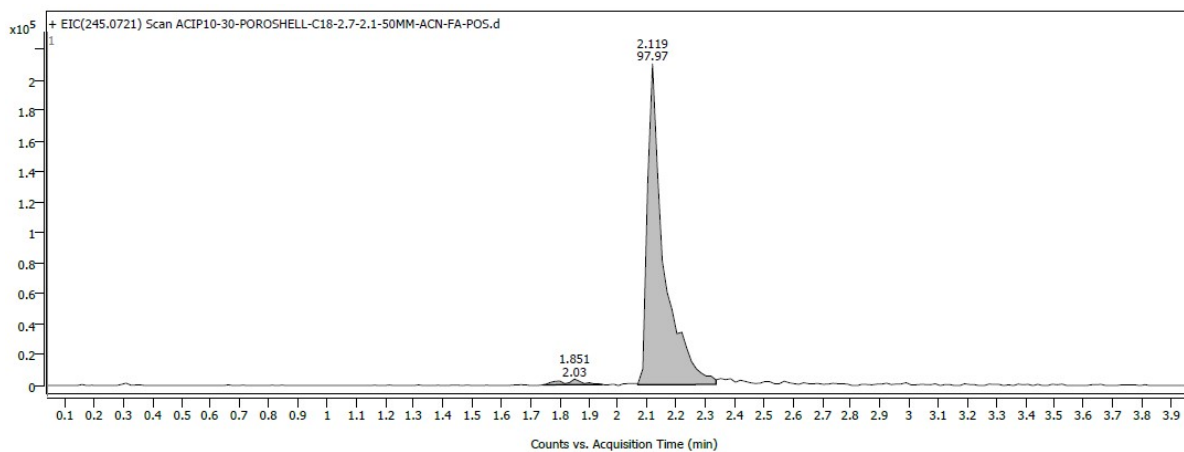

Figure S21: Extracted ion chromatogram (EIC) for  $m/z = 245$

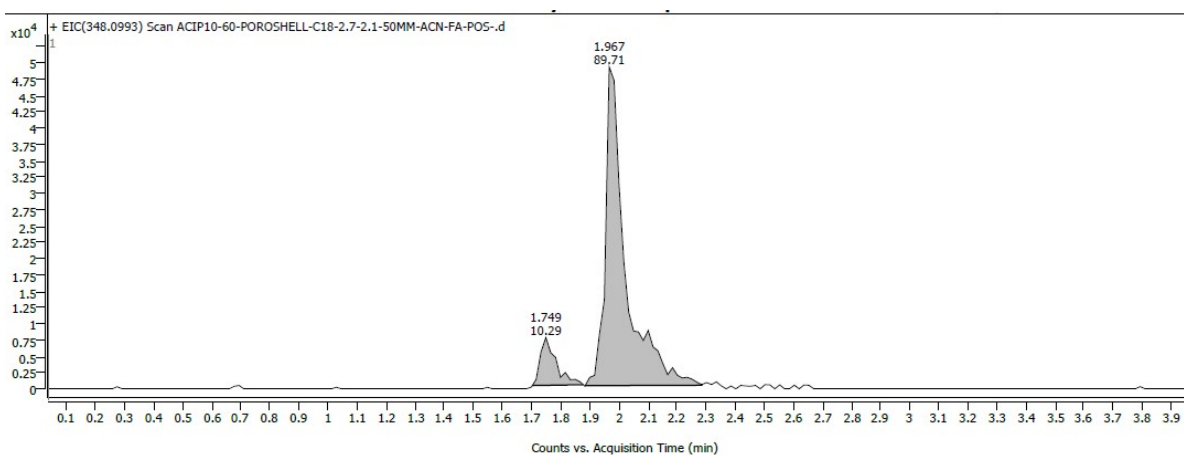

Figure S22: Extracted ion chromatogram (EIC) for  $m/z = 348$

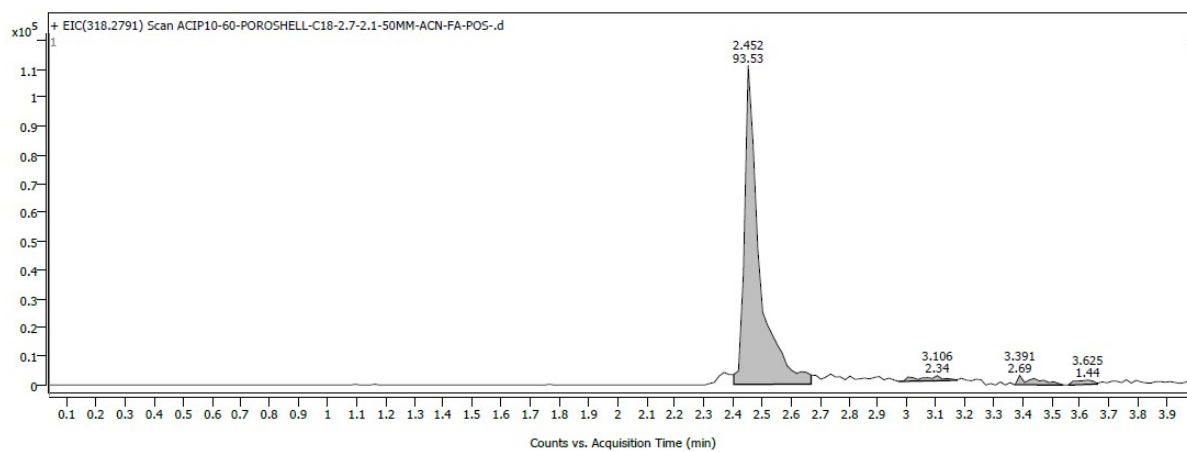

Figure S23: Extracted ion chromatogram (EIC) for  $m/z = 318$

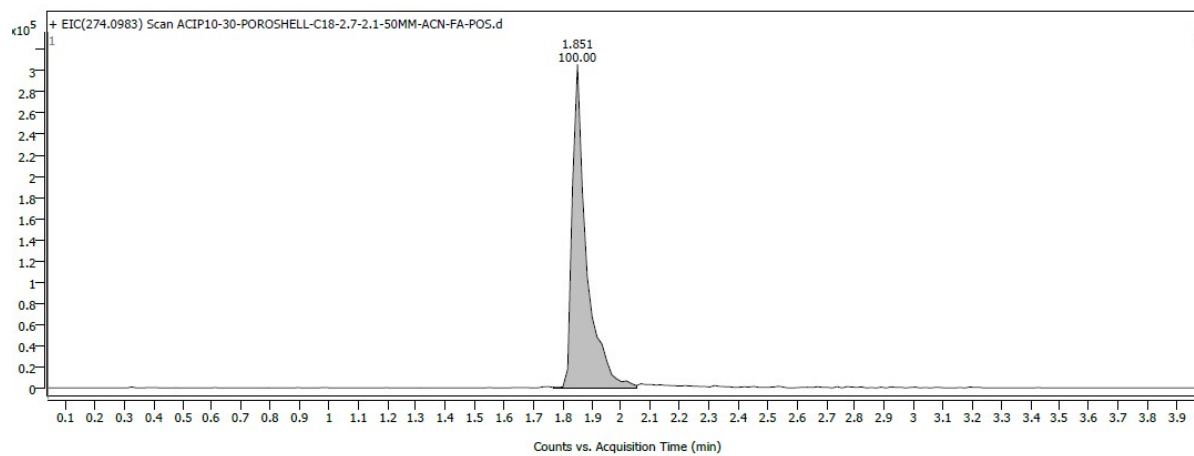

Figure S24: Extracted ion chromatogram (EIC) for  $m/z = 274$
